# **I DID NOT SCREAM. I COULD NOT; I WAS TERRIFIED. I JUST FOLLOWED THEM...I BLOCKED MY MIND. THEN THEY ALL RAPED ME: A NARRATIVE INQUIRY ON THE ONSET OF TONIC IMMOBILITY AMONG WOMEN RAPE VICTIMS IN NIGERIA.**

Dooshima Dorothy Gbahabo<sup>1</sup> \*, Sinegugu Evidence Duma<sup>1</sup>

<sup>1</sup>Discipline of Nursing, School of Nursing & Public Health, College of Health Sciences, University of KwaZulu-Natal, Howard College Campus, Durban 4041, South Africa.

\*Corresponding author

Email: dooshima.gbahabo@gmail.com

## **Abstract**

Tonic immobility (TI) is a common uncontrollable autonomic mammalian response to an extremely fearful situation. It is one of the most immediate devastating consequences of rape and remains poorly understood. While controversies over its definition persist among researchers, this also reflects the care for and support to victims. The study aimed to explore and describe the onset of TI and the meaning attached to the experience among women raped victims in Nigeria. The study design was the qualitative narrative inquiry approach. Criterion and purposive sampling were conducted across four post-rape care facilities in Lagos, Nigeria, to recruit 13 participants. In-depth face-to-face interviews were conducted using a semi-structured interview guide to generate data that were thematically analysed. The findings of the study reveal five themes relating to the onset of TI as follows: the first two focused on the experience of TI: (1) the onset of TI prior to rape due to perceived imminent danger, (2) the onset of TI as a self-protection mechanism from further harm) while the last three relate to the meaning-making of the experience of TI (3) self-loathing as a meaning attached to TI, (4) suicidal ideations as a meaning attached to TI, and (5) divine intervention as a meaning attached to TI.

Conclusion: The findings underscore the experiences and meanings that participants attach to TI following rape. There is a strong likelihood that tonic-immobility is not an uncommon experience amongst rape victims, but that in the absence of research, specialized care on the condition, and its associated consequences will haunt many women, affecting their psychological well-being and their entire quality of life. Describing the phenomenon as it is experienced by the participants is critical because understanding the condition is the first step toward effective appropriate management.

*Keywords:* Onset of tonic immobility; tonic immobility -self-loathing; imminent danger; tonic immobility -self-protection; tonic immobility -suicidal ideation; and Nigeria.

## Introduction

More than 250,000 rape cases are registered yearly worldwide (1, 2) this highlights rape as a global public health challenge in many countries because of its dire consequences (3, 4). In Nigeria, there is sparse national information with only two out of 40 rape cases being reported to the police (5, 6). Obviously, less research has been dedicated to in-depth studies of rape incidence in the country, hence sparse provable data on rape cases, (6, 7). Available data from different states in the country had shown a decrease in rape prevalence ranging from a 15% decrease in Ibadan, Oyo State (8), 13.8% in Maiduguri, Borno State (9) and 0.8% in Lagos, Lagos State (5). However, despite declining state rape data, a 2017 study of female health workers in Nigeria by (10) showed that sexual abuse (SA) (71.7%) was most common form and generally about 90% of all reported SA cases were related to rape (11). An immediate and devastating consequence of rape is tonic immobility (TI) which (4), reported that out of 298 women raped, 70% had the experience.

Tonic immobility, an uncontrollable autonomic mammalian response to an extremely fearful situation, is one of the most immediate consequences of rape, which is triggered when fighting the rapist does not appear conceivable and there are limited other means for self-protection (4, 12-15). TI is a product of the defence cascade that involves stress, fear, the threat to life, and is one of four outcomes that manifest when the body system is highly stressed: fight, flight, freeze, and TI (16). The onset of TI manifests itself as a reversible catatonic-like state with muscle hyper- or hypo-tonicity; tremors, trembling or shaking; the inability to vocalise or control the muscles and movement, feeling of numbness, cold, detachment from self and the immediate environment; and relative unresponsiveness to external stimuli in a context of the inescapable threat (4, 14, 17). Other signs of TI include intense fright expressed at a later recant with phrases such as “I was scared stiff” and “I was frozen with fear” (18). According to (19), women are more likely to report such experience if they were sexually abused as children. In addition, while TI may shield a victim from further physical injuries and the severity of an attack, its occurrence due to SA trauma has been linked to the development of post-traumatic stress disorder (PTSD). Extant literature associates TI with survivors’ reporting personal experiences of psychological nature such as humiliation, guilt, and self-blame from the perceived failure to protect themselves during the rape incident (14, 20, 21).

Although TI has been identified as the most immediate consequence of rape, it has not yet been fully explored in humans, being an emerging area of research interest globally, and in Africa specifically (4, 14, 22). This may explain why very little is known about its occurrence among Nigerian women victims of SA (23), or why it is not understood by the public, the legal system and health practitioners who deal with survivors seeking legal and health care. Such lack of

understanding of TI by the major stakeholders dealing with victims and survivors of SA may lead to the incapability to identify and address the immediate and associated long-term consequences, resulting in unacceptable legal and health outcomes for victims and survivors.

Knowledge about TI, and the recognition of its onset and manifestations, are critical for all health professionals and first responders, especially the clinical forensic nurses and doctors who are responsible for providing appropriate and immediate nursing management and clinical forensic medical to the victims and survivors of SA. The victims and survivors, their families, and the police also need to know and understand TI, its onset, and various its clinical manifestations. Such knowledge may reduce self-loathing among those who experience it from SA or are blamed by others for having not protected themselves during the incident.

There are however different thoughts about what TI is among scientists (12, 19, 24-26), including opposing views regarding its nature in rape victims. For instance, while (27, 28) refer to the phase of mental paralysis during or immediately after rape as TI and similar to a freeze response, (29) argue that it occurs early in the encounter stage of a defensive reflex. On the other hand, for (30), the onset of TI is shown by a rape-induced paralysis, the two actions denote the same phenomenon. This lack of clarity as a standard for TI may have implications in decision-making towards developing appropriate intervention algorithms (31). It was stressed by (16) that understanding these concepts leads to tangible means of preventing maladaptive behaviours as consequences.

The aftermath of the devastating effect of rape, may often lead victims or survivors in the attempt to find meaning to their predicament (32, 33). Meaning making manages hurtful events

that result in uncertainty in a victim's global and situational meaning arrangements (34). However, if the global meaning (beliefs why bad things happen, values) of victims is not consistent with the situational meaning (one's circumstances and how those circumstances are understood), this will result in distress and as such, meanings will be made to cope with the distress (35). According to Park and other authors (36-38), meaning aims to restore disrupted global views by victims engaging in mental processes to develop new and acceptable ways of understanding a stressful situation that are consistent with their held beliefs or values or by changing them to favourable ones, an outcome of this is called 'meaning made' (38). But if the stressor and situational meaning are consistent, there will be no need for meaning making. This study was therefore undertaken to explore and describe the onset of TI and the meaning participants made of their experiences of it.

## Materials and methods

### Research design

As a qualitative research design, the narrative inquiry (NI) approach was used due to its conversational nature in data collection, and its ability to allow the participants to easily tell their stories on the onset of TI and share their experiences with the researcher. This approach accorded the first author an 'insider view' for a deeper understanding of TI's onset from the participants' perspectives (39).

### Study setting

The study was conducted in three purposefully selected government general hospitals' post-rape centres and one registered non-profit, non-government organisation (NGO) facility that provide care and support services to survivors of sexual assault in Lagos, Nigeria. Each of the selected government hospitals was reported to be receiving an average of seven adult rape victims per

month, while the NGO, which also provided services to post rape cases, recorded approximately 30 rape victims monthly, including adults and children. The reasons for more victims attending the NGO facility could be due to the facility being better equipped with full spectrum of services required and its enhanced privacy.

### **Sampling and sampling size**

Criterion-based, deliberate, and purposive sampling strategies were applied to select and recruit 13 adult women who self-reported as having been raped within a period of 12 weeks from the start of study at the identified health facilities. The sample size was attained through data saturation, meaning that no new knowledge was obtained from the preliminary analyses of data after the 13th participant, with further recruitment of participants for data collection deemed redundant (40). This sample size was considered adequate and acceptable for this qualitative study, as the focus was to have a deeper understanding regarding the onset of TI from the participants' perspectives rather than to generalise the findings (41, 42).

### **Inclusion and exclusion criteria**

Potential participants were included in the study if they were aged 18 years or older, had self-reported to have been raped within 12 weeks of the start of the study on 1 December 2018, and had experienced at least one or more manifestations of the onset of TI listed in the study's information sheet. The manifestations included the inability to control their muscles and movement, call out or scream; numbness; fast heartbeat; rapid breathing, and fear for their life (43-45). They had to understand and communicate in English or the Nigerian Pidgin English language, as Nigeria has over 350 languages, with Yoruba, Hausa, Igbo, English, and Pidgin English being official. They needed to have access to a functional mobile phone for sustained

communication during data collection and for member checking (46, 47). Potential participants who reported or were known to have mental health problems were excluded from participating to avoid exacerbating their condition due to the sensitive nature of the research questions (48), in compliance with the principle of doing no harm (49).

## **Recruitment of study participants**

Participant recruitment began after the ethical clearances were obtained and were conducted by the first author with the assistance of trained counsellors who were assigned in each facility (Facility Focal Person, FFP). They liaised with the first author once potential participants were identified. Each FFP was trained on the study's purpose, the importance of confidentiality, and the eligibility criteria to enable them assist with recruitment, inform participants of the study and ask for their willingness to participate. Women who were willing to participate were linked by phone to the first author for further interaction. A preliminary interview was held to confirm their experience of TI before recruitment into the study and to initiate a trust relationship between the participants and the first author (50, 51). Dates, times, and locations for each in-depth individual interview was negotiated with each participant. In line with the principles of NI, the first author sustained the developed relationship and interest with the 13 participants (52). After each in-depth interview, the women were reimbursed for their travel costs (22, 53).

## **Pilot study**

Two participants were purposefully recruited, one each from a government hospitals' post-rape centre and the NGO for a pilot study, which was conducted in December 2018, using the study's pre-determined inclusion criteria. The pilot study aimed to assess the adequacy of the semi-structured interview guide that was designed by the authors to stimulate the desired narratives

from the participants. The analysed pilot data validated the appropriateness, simplicity, and adequacy of the in-depth interview questions in eliciting the necessary data. A modification to the in-depth interview guide was suggested by a counsellor at the NGO such as the word ‘rapist’ replaced with ‘assailant’. The findings from the pilot study were included with the data from the main study and did not contaminate the results in any way (53).

## **Data collection**

The data collection for the main study started late in December 2018 and was completed at the end of August 2019, with interviews conducted in English and/or Nigerian Pidgin in settings chosen by each participant for their comfort and safety (54). These included the NGO post-rape care facility (N=1); the first authors’ vehicle in a public parking lot (N=1) and across the three government general hospitals (N=11) in Lagos on weekdays. The participants demographic details were obtained (age, education, type of rape) using a short questionnaire. A semi-structured interview guide was used, and the main question was: “*When you think back, at what period did you first experience all the bodily reactions you earlier identified?*”. Following the NI approach, each participant was given time to think, reflect and gather her thoughts before responding. This was followed by a few probing questions depending on a participant’s narrated story. During the in-depth interview of approximately 60 minutes’ duration, each participant narrated her story of when she experienced the manifestation of TI but only as much as she wanted (51).

## **Data management and data analysis**

The participants were identified by their serial numbers for example, Participant as P1 and on to the last participant as P13, and then their age range. These were used to code their data, audio



files, transcripts, manuscripts, and folders to ensure anonymity and confidentiality (55), with the facilities' initials being as folder acronyms. The digital data was stored on a password-protected computer, with access restricted to the two authors, all of which will be destroyed after five years.

Braun and Clarke's (56) six steps of thematic analysis were used to manually analyse the narrative data obtained from the participants. Firstly, the first author transcribed the audio recordings verbatim, and cleaned the text by conducting quality checking against the original recording. This entailed listening to the audiotapes and noting first impressions before typing out the transcripts (57). Each participant's narrative was read reiteratively and inductively to ensure a thorough grasp of the data while noting patterns of interest across all their data (58). Secondly, notable features were coded to help organise the data and describe the nature of the content, with reiterative reflection enabling new insights to be observed on repeat reading. Thirdly, a list of the codes was created and examined to identify patterns within them, and to begin generating likely themes, which were grouped according to their relationships and similarities. Fourthly, the developed themes were reviewed and modified, the relevant data being assigned to each. Fifthly, the emerging themes were defined and pegged with meanings to indicate their significance (59). The dossier of themes and related quotes from the raw data was shared with the second author for confirmation and verification. Both authors reviewed, redefined, and renamed the themes by aligning the meanings of the raw data with the characteristics of the onset of TI (60). The sixth and final step involved the production of this scholarly report of the analysis (56).

## **Ethical considerations**

Ethical clearances were granted by the Biomedical Research Ethics Committees of the University of KwaZulu-Natal (UKZN), Durban, South Africa (BE 402/18), and the Lagos University Teaching Hospital Health Ethics Research Committee (AD/DCST/HERC/APP/2448). Gate keepers' consent was obtained from the Lagos State Primary Health Care Board (LS/PHCB/MS/ 1128/VOLIV/073), and the Lagos State Health Services Commission (LSHSC/DNS/RESEARCH/VOL.III/41). Verbal s to conduct the study were provided by each of the health facilities included in the study.

The protocols of the (49) were applied throughout the data collection and analysis processes, and the following five ethical considerations in qualitative research were applied (61). Firstly, a relationship was developed with the participants and trust built to enable their richer stories to be gained. Secondly, informed consent was upheld by explaining the research process, as contained in the health information sheet, in simple English and Nigerian Pidgin. Participants' consents were obtained through signed consent forms, with an assurance that they could withdraw from the research at any point without any consequences. Thirdly, anonymity was upheld by protecting their identities and documents. Fourthly, to uphold beneficence, negotiated arrangements were honoured. To avoid re-traumatising the participants, the research questions were first pilot tested for suitability. Fifth, the research findings were presented with honesty and integrity. The first author was reflexive at every stage of the research, of the process to avoid influencing the evidence supports to any conclusion when it does not do so. This consisted of the first author's mindfulness of her role in the research process and made deliberate efforts that reduced her subjective role. The first author explored and documented her pre-conceived ideas,

personal characteristics, epistemological and philosophical perspectives prior to the commencement of the qualitative study.

## **Qualitative rigour**

Credibility and transferability were applied for academic rigour (40, 62), with the first author telling the participants to narrate their stories at their own pace while assuring them that all their stories were valid (63). The repeated listening to the audio-recorded interviews and iterative reading of transcripts to verify ‘internal consistency’ was done throughout data analysis (64). In validating the narratives, member-checking was conducted, with five participants confirming that the transcripts and their interpretations were a true reflection of what they narrated (46). In ensuring transferability (i.e. qualitative validity, the degree to which the findings can be transferred to other contexts with other respondents), a thick rich description of the in-depth interview processes and presented findings with supporting quotes are provided. The presented themes were developed from the participants’ narratives of their real-life traumatic experiences of the onset of TI during their rape ordeals. Other processes of the research were described to enable replication. To maintain accuracy and validity, and to avoid conflicting aspects, the transcriptions were reiteratively cross-checked with the audio-recorded interviews by both authors, which assisted the authors to define and refine the themes as findings.

## **Findings**

### **Demographic characteristics of participants**

Of the 13 participants the youngest is 18 and the oldest 35 years old. Twelve were married, while one was single. Eight had secondary education, while five attained post-secondary education. Nine were Christians and four Muslims. Three participants were raped by neighbours and

another three were raped by acquaintances. Two participants were raped by two different pastors. A participant was raped by her boyfriend, and another one by unknown gunmen. A participant was raped by a group of armed men, another by a hotel guest, and a last one by her tailoring instructor.

Five themes emerged from the analysis of the narrated stories from the 13 participants: (1) Onset of tonic immobility prior to rape due to perceived imminent danger; (2) Onset of tonic immobility as self-protection mechanism from further harm; (3) self-loathing as meaning attached to tonic immobility; (4) suicidal ideations as meaning attached to tonic immobility, and (5) Divine intervention as meaning attached to tonic immobility.

# **Theme 1. Onset of tonic immobility prior to rape due to perceived imminent danger**

This theme emerged from participants' narratives of experiencing symptoms suggestive of TI when they perceived threats of bodily harm from the assailants who were equipped with various weapons and threatened victims into submission to being raped. Bodily changes representing TI were experienced as a response to extreme fear from sensing imminent danger to harm from such weapons, as expressed in the following extracts:

*It was still early in the evening that day after work, on my way to the bus stop, when four men approached me from nowhere. One of them showed me a big/ shining knife that he had with him, while another one of them asked me to follow them. Immediately when I saw that knife, I was shocked and froze there and then. My whole body just went weak. I did not know what to do. I did not scream; I could not scream; I was too terrified. I just followed them; I do not know how...I blocked my mind. I think they all raped me..." (P1, 26-30).*

*I am a hotel receptionist. On this night, a guest called that he had a problem with his room, so I went to assist him. When I entered his room to show me what was wrong so I could help him, he grabbed me from behind, held me tightly, and pushed me further into the room. He threatened me with a gun and a knife, and said if I did not cooperate with him, he would use both of them on me. My body went cold. I was confused, afraid, and just felt very weak and could not move; my knees could not carry me. He pushed me on to the bed. That was when he raped me. I just looked at him and could not even scream or fight him off. (P2, 26-30).*

*As a food vendor, I sell food around. Since my husband lost his job, I have been selling cooked food. So, this man I have known for a while called me to buy food from me. He asked me to get a plate from his kitchen, and that is where he attacked me. He brought out a kitchen knife from a kitchen drawer and pointed it at me. It was unbelievable, I wish I did something to stop him, but I could not. I was rooted there. I could not move nor say anything. I obeyed all his commands. He raped me. I was weak, shocked, and ashamed, but I did not feel anything about what he did to me. (P3, 31-35).*

*They pushed me down to the ground. It is like it was a long while before they started taking off and ripping my clothes, tearing my bra, and doing all sorts of things to my body including running a razor over my naked body that I realised this was the end for me. So, I was terribly scared by then, but I was unable to shout. I could not even move my body. I could not even struggle; I just lay there on the ground and closed my eyes. Each one of them raped me after the other and I was just lying there like a rod. (P4, 26-30).*

## **Theme 2: Onset of tonic immobility as self-protection mechanism from further harm**

This theme derived from the data suggestive of the onset of TI following initial acts of aggression and violence towards the women who did not see the likelihood of escaping. Their

bodies responded by going into TI as self-protection mechanism from the intensity of further attacks and physical injuries, as indicated in the excerpts:

*My friend's boyfriend was to take me home, but he first asked me for sex, and I refused. He got violent and started hitting me and threatening to throw me out of his room. This was around 2 am. I knew that I was stuck there. He started beating me. I first tried to fight him, but he did not stop beating me. Suddenly I could not move, my arms could not fight him. I could not scream either. I could no longer move but knew what he was doing to me. He pulled down my clothes, ripped my underwear and did it. (P5, 26-30).*

*As he was approaching me, I was retreating backward against the wall, becoming deeply scared. I tried to run but, where would I run to? He pounced on me and was hitting me everywhere. He pushed me onto the bed with force, was on top of me, tore my clothes with such anger and a fierce look in his eyes. I lay frozen with fear on the bed where he pushed me. He stopped hitting me, maybe thinking I was dead, but he continued and raped me repeatedly (P6, 31-35).*

*On my way from my granny's home, I passed by three men whom I thought were talking among themselves. Immediately I passed them, I felt a hard slap at my back. This was without provocation. The other two joined in beating me. I was overwhelmed and did not struggle with them. They tossed me about before throwing me on the bare ground; and raped me, one after the other. After a while, the beating stopped, I do not know when because I have never been that scared before. I did not try to defend myself; I was shattered. I knew what was happening, but I just did not react because of my fear of them. (P7, 16-20).*

*He had his way; I was raped. I was not able to shout or do anything, I was just in shock and so confused. I could not believe what was happening at that time to me and by this person. He was a friend. My body felt heavy and motionless on the rug where I had collapsed. At*

*some point, he stopped being violent. It was just a lot for me to process... I remained there, tuned off. I was shaking, sweating, very confused and crying. I was so lost and confused. (P8, 26-30).*

### **Theme 3: self-loathing as meaning attached to TI experience**

This theme was framed from the data expressing the participants' narratives of the meaning and emotions they later experienced towards themselves for failing to do something to protect themselves from their attacker. These emotions included self-shame, loss of self-respect, humiliation and guilt feeling, as indicated by some of the comments below:

*After it (rape), I just felt as if the whole world knew that I gave in to that without a fight or a cry for help. I felt that my self-worth was reduced, as if everyone knew what had happened to me. And that kind of made me ashamed of myself, lose my confidence, and feel unworthy. I had let myself down, obviously. (P3, 31-35).*

*I lost it all: lost my self-respect and career as I could not avoid what happened to me. I see myself now as a second-class citizen, no longer worthy to be a human being. I have nothing to offer; my dignity is gone from me (6, 31-35).*

*When I remember how I was so helpless and let it happen, the whole thing makes me feel less and less of a human being. It has lowered my self-esteem. I do not even express myself in public anymore. I have been very withdrawn since the incident and now live inside my shadow and my shell. (P9, 21-25).*

*I feel useless, knowing I could have fought back. I had been beaten and because that's basically what happened, I now feel like a complete loser. (P5, 26-30).*

*Feeling about myself, I will say that after what happened, I feel dirty, ashamed, unworthy, and that something valuable had been taken away out of me. So, I did not*

*know whether I was just ashamed to tell you the truth, but I felt dirty, and I hated everything about myself after that (P3, 31-35).*

*I felt bad about myself and the bad things that kept happening to me. And this is not the first time I've been raped. The people around me always had a bad impression of me, which I hate. I hate myself and I do not want to be a burden to anyone. (P10, 26-30).*

**Theme 4. Suicidal ideation as meaning attached to tonic immobility** This theme emerged from participants' narratives about wanting to die due to not being able to defend themselves during the rape, recriminating the fact that they made no effort to protect themselves, as indicated in the following extracts:

*When I think and remember that I just lay there and did nothing to defend myself, I feel like killing myself because it is so humiliating. How can I even mention that something like that happened to me, and I did nothing? What am I living for? (P11, 16-20).*

*Whenever I think about how I just lay down there and failed to protect myself, I feel like I am not worthy of living. I feel like committing suicide. Sometimes I feel like going away forever. Moreover, it has changed everything about me, I am not as free as I used to be I have become withdrawn, and very sad. So why must I continue to live? (P6, 31-35).*

*Not being able to defend myself from the hands of my attacker was the experience that made me have a death wish. It is a terrible experience. After that, I do not see myself as a complete person again; it is like I allowed something to be stolen from*



me and did not fight for it. I feel like a total mess and cease to exist in my mind after that experience. (P8, 26-30).

Because the first person who sexually abused me as a young girl made me believe that anything that was happening to me was already written and signed by God and not a mistake, with the recent rape, I felt deep hate towards myself. I told myself that it was better to die, that I was going to kill myself because I felt I would not be able to heal from all my pains (P12, 26-30).

#### **Theme 5: Divine intervention as the meaning made of tonic immobility**

This theme emerged from the participants' narratives which infer making meaning of their experiences from spiritual perspectives as indicated from their comments:

Even though lying there paralysed and not able to do anything was bad and terrible, it proved to me that God loves me. I believe that it was God that was working for me. He confused my assailants to think I was dead so that they could stop the rape. I thank God. The men who assaulted me threatened to deal with me, but God confused them. They left me after raping me, they could have killed me; I give God the glory. He is truly a living God. (P4, 26-30).

After the second experience of a rape that I could not prevent by fighting off the attacker, I could not stand the shame and reminder each time I got home. For this, I decided to relocate to another state from Lagos. It was painful. It was humiliating that I did nothing. But by the grace of God, it helped me decide finally to leave Lagos for another state to continue with my life. (P9, 21-25).

*I could not fight off my attacker, but something made me stronger, afterward. I got up and realised that I could walk from there; something somehow gave me my power back. I walked away from the scene and looked for help. God indeed helped me. (P5, 26-30).*

*For days I could not go out. I cancelled all the church activities I had planned for that week, asking myself, “What kind of church activities will I carry out when I don’t feel God’s presence around me anymore? Where was He while I was being raped?” I sometimes think that maybe it was God’s intervention that made me to be still and do nothing in order to protect me. (P13, 26-30).*

## Discussion

The aim of this study was to explore and describe the onset and meaning attached to the experience of TI as a phenomenon among African raped women in Nigeria. Our findings reveal that the age range of participants in the present study to closely resemble those of the participants of a study by Moller et al. (4).

TI is a complex phenomenon that occurs mostly before rape in humans once they perceive extreme danger and has many ramifications for the victims. Although TI is an established physiologic reaction due to severe trauma, such as rape, individuals respond uniquely in its manifestations, the main manifestation being paralysis. In addition, victims appraise the situation and attempt to make meaning of their experiences. Understanding the complexities suggestive of TI is critical developing appropriate interventions for the management of victims of rape.

# **Theme 1. Onset of tonic immobility prior to rape due to perceived imminent danger**

The findings on the onset of TI prior to rape was due to the perceived imminent danger as a result of the presence of weapons and supports the findings about their use in rape cases. Perpetrators have been reported to use weapons to instil fear, assert control, and prevent victims from any attempt at resistance (65, 66). These findings further confirm the report by (67) that weapons use during rape was common in Africa.

The accompanying feeling of inescapability ignites a TI like state (43) when the attacker physically confronts their victim. Participants narrated how they were frozen with fear, their bodies going limp (P1, 26-30; P2, 26-30; P3,31-35), characteristics that agree with Marks' definition of TI (68). Being confronted by an armed attacker created extreme fear in the victims due to the anticipated consequences of being attacked and injured by someone who was clearly physically stronger than they were and had every intention of harming them (69, 70, 44). The participants' narratives aligned with (65), that weapon use during SV was common to instil fear, assert control and prevent victims from any attempt of resistance, fear being significant in the induction of TI (71,4). This study affirms (67) report that weapon use during rape was common in Africa, which could be a health concern in Nigeria, as traumatic situations suggestive of TI abound and are linked to PTSD (72).

There are occasions where TI occurs immediately after rape, which (73) describe as a severe and persistent traumatic state that occurs after a traumatic event. It is explained as a feeling of 'flopping down', that is, when the victim falls to the ground and just cries (74). Narratives like this are central to backing up theories and explaining why victims of rape are said to be unable to defend themselves but can explain in detail what had happened. These behaviour manifestations often confound first responders, police, lawyers, and health practitioners, due to lack of

understanding of TI, who they fail to accept how a victim is able relate the horrific experience of rape but unable to explain why they could not do anything to resist it. Similar to the findings of (74), the findings from this theme also clearly show the need to further inform individuals about all responses to TI trauma and to indicate that it is both a common and natural reaction to SV.

## **Theme 2. Onset of tonic immobility as self-protection mechanism from further harm**

TI has also been referred to as ‘death feigning’, which is regarded as an adaptive anti-predator behaviour (76, 43, 77), and a self-protection mechanism from further harm, given that they had already been physically assaulted and did not know when it would end (78, 79). Similar narratives were reported in the present study, some participants (P5 26-30; P6, 31-35; P7, 16-20; & P8 26-30) expressed halt catatonia to their advantage. The scientists mentioned further that that feigning death might deceive an attacker into believing that the victim is disgusting and giving up. Being paralysed was more accurately recognised as a self-protective stress reaction outside the volition of the victim (43). Ford and partners (80) endorsed the assertion, stating that in a severe trauma situation, with no other viable escape option, the body’s energies are redirected toward staying alive, hence inactivity. According to (76, 77), TI at this point could protect victims from increased injury, force, severity of the attack and could provide a means of escape to victims. However, (81) questioned the protective nature of TI, insisting that some victims get hurt, despite ‘feigning their death’. Our findings do not indicate if any additional harm happened during the rape as the victim lay helpless, but there is a strong indication that perpetration happens even when the victims were ‘frozen’ or motionless, thus indicating that such ‘paralysis’ did not stop the perpetrators from completing their acts of sexually assaulting the victims because of their paralysed state.

### **Theme 3: Self-loathing as meaning attached to tonic immobility**

Our findings revealed self-loathing and self-blaming among participants who experienced TI due to their inability to protect themselves from being raped, fight the perpetrators, or scream to be rescued having been incapacitated by the paralysis. As the participants had no control over their ability to defend themselves from the rapist due to their involuntary paralysis, they took this failure as personal, and developed self-loathing. Self-loathing on its own is not a disorder, but it is one of several possible symptoms of depression. The participants did not understand that their body can become physiologically stressed under extreme fear to the point where they are rendered incapable of moving or defending themselves, or calling out, restrained thereby rendering them completely vulnerable to being violated (16, 82). Victims therefore become angry and hate themselves for their inactivity, feeling that they allowed the rape to happen, which results in the emotional destruction of their self-pride, dignity and sense of integrity being incalculable, and for which they feel responsible. Similarly, (83) corroborated the view of emotional self-destruction among participants due to their misconception of their physical inactivity during rape. One of the worst emotions sexually abused persons experience is the sense of worthlessness and self-hatred, which is often accompanied by the feelings of guilt and shame (43, 84).

In another study, rape survivors who experienced TI reported to have felt guilty, had negative self-assessment of themselves and be emotional withdrawn (20). Similar conclusion was made regarding victims 'experiences of TI being associated with the risk for developing self-loathing from self-blame (84). Lloyd et al. (20) referred to the emotions as self-loathing, which is a state of diminished sense of well-being and a trauma-related altered state. For self-loathing to occur, victims would have taken the sole responsibility for their rape and believed that they contributed

to their ordeal (85). This was the ordeal of this participant who felt that it was her fault that she was raped, and narrated... *"I have been very withdrawn since the incident and now live inside my shadow and my shell"*. (P9, 21-25, raped by a tailoring instructor). This participant was reacting this way because she was blaming herself for being raped. Jordan (86) and Rousseau, (87) warned that such self-blame is very damaging and could cause the victim more trauma. As self-hate has been found to predict suicide ideation (89), it is essential for health practitioners to understand self-loathing as the feeling that survivors attach to experiencing TI. This will enable those providing care and support to specifically look for such emotions, understand their origin and reassure them that they are not to blame for what happened and how they responded during the incidence. Information regarding the onset of TI and its effects on survivors of rape should be formally taught to all health professionals during their undergraduate training and as part of continuing education programmes. Regarding meaning attached to the experience of TI, participants did not attach any meaning to the experience of TI. According to Park, (38), *meaning is made* only when people have a different view of the situation and have altered their beliefs and goals to reclaim consistency among them. This could be because, participants were recruited only after twelve weeks of the experience of TI. TI is a behavioural response and to alter behaviour requires a considerable time. At present, studies where meanings have been made from SA, participants were abused as children and were only asked to make meanings to it as adults (90).

#### **Theme 4: Suicidal ideation as meaning of tonic immobility**

Identifying suicidal ideation (SI) as the consequence of experiencing TI became one of the major concerns in our study. Four participants who narrated this were immediately referred to the psychologist of their choice among the two who were on standby for additional follow-up care.

Thoughts of suicide in response to TI is consistent with other findings on the victim's experiences of SV trauma (91-95). SI following the experience of TI is often associated with guilt, shame, and self-blame, and is like other findings that note that they intensify notions of suicide (92). Magalhaes et al. (96)'s observation that prolonged TI is associated with PTSD symptoms in individuals who had experienced trauma agree with Moller et al's study (4), which showed that 70% of the 298 sexually assaulted women experienced or developed psychological complications. Conversely, Brewin and Partners (97) contended that only a small percentage of victims met the criteria for trauma-related stress disorders. This may explain why some studies report that suicide is often considered by many rape survivors (98), but not all persons who have suicidal ideations attempt suicide (99). However, despite these findings even a low rate of suicidal thoughts among victims is critical enough to be alarmed.

Based on these findings, we recommend that health practitioners be encouraged to assess for suicide ideation during follow-up visits among all rape survivors, specifically those who reported to have experienced TI and show signs of self-loathing. It is therefore crucial that all rape victims who report to have experienced TI during their ordeal to be assessed for early identification of SI as a global public health concern (ICD 10-CM) and the second leading cause of death worldwide (100-101). This is especially so in Nigeria, where a study recently reported that the pooled prevalence of suicidal ideation was 9.8% and pooled suicide attempts was 16.2% annually (102). Although the research was on HIV, influencers of SIs, the SI influencers of the study were similar to psychological symptoms experienced by the participants in this study. Moreover, (103) declare that SIs are a warning signs for and regulate the prediction of completed suicides. The findings from this theme show the need to further educate individuals on appropriate responses to trauma, and to highlight that the need for a strategic responsive intervention

mechanism that will improve care and support and counter the development of psychological complications from TI among individuals. According to the meaning making model following trauma by (35), after trauma, participants are expected to involve in reasoning evaluation of the situation against their held beliefs or values. But the outcome of their evaluation being SI mean they could not find any favorable meaning to tie their emotions after the abuse to, hence inconsistencies waiting to be resolved and SI in the interim.

### **Theme 5: Divine intervention as meaning made of tonic immobility**

The findings related to understanding the onset of TI as a divine intervention reveal the importance of finding meaning spiritually among survivors of rape and how they cope with the unexplainable, because some individuals in Nigeria believe rape to be a spiritual phenomenon (104-105).

Park, (35) explained that usually, the purpose of meanings made are to change the meaning of a situation to a favourable to promote growth. Spirituality is an important factor towards meaning making and healing among victims of SA (23, 106, 26) as participants often took the situation as being allowed by God. Further, some participants in the present study associated the inability of physical movement of their body as the power and tranquillity from a Divine Source that manifested to help and protect them from a worse fate during their ordeal (107). This was supported as shown below by an extract from this study: *"It proved to me that God loved me. I believe that it was God that confused my assailant to think I was dead"* (P9 21-25). She found meaning in her TI state and attributed it to God, and this changed the very meaning of the distressful meaning of experience of TI (108). According to context of trauma, this is known as being triumphant despite devastation that is the ability to convert the view of a personal ordeal to



a personal achievement (109). Thus, the meaning made here is seen as an embodiment to a new understanding that will ultimately, promote well-being (38,110). Masten, (111), alludes this new understanding to resilience which according to him, showed the ability to adapt to and recover from adverse circumstances that enable one to return to improved levels of functioning. On the other hand, another participant who felt that divine intervention should have prevented the incidence from occurring in the first place, rather asked “Where was He (God) while I was being raped?” (P13, 26-30), suggesting that if there was a God that this event should not have happened. Cummings and Pargament, (112) acknowledged that some individuals may question God, as P13 did, hence indicating negative coping and meaning that meaning was not made here.

Messina-Dysert (98) endorsed that SA can have a damaging effect on the spiritual health of women thereby testing their faith and displaying their frustration with God. Spirituality often weighs heavily in individual’s efforts to deal with serious trauma and a frequently used resource for people coping with a variation of stressful and traumatic experiences (23, 38). Conversely, a northern tribe in Nigeria considered psychological symptoms to mean ‘destiny’, believing that the symptoms are ordained by God (105). Often, according to (113), spiritual meaning making gives a source of comfort and intelligibility during a difficult time. Such individuals may not consider medical management when experiencing psychological problems but rather believe that it is God’s wish for them, and the danger with this is the transition to severe psychological stress may be missed. Despite the differences in understanding the role of the divine in the rape experience, and the consequences for the value of spirituality in the recovery process and spiritual health, we recommend that health practitioners acknowledge the survivors’ spiritual beliefs in their provision of holistic care by referral.

## **Strengths/limitations**

The study has strengths as well as limitations. The major strength to the best of our knowledge, this is the first study of its kind in Nigeria, it was Afrocentric, and contend that it will promote further research interest in this area and would add to decisions that would inform the development of appropriate interventions for good mental health of affected women and commiserate legal outcomes for survivors of rape. Although a small sample size was used, the study findings are informed by women's voices and thus provide authentic evidence of the onset of TI among the participants. In addition to the strength of the study is the findings on meaning making which are scarce in sexual abuse studies, this study may open up interest in this area as much as it is at present with child sexual abuse studies.

The obvious limitations of this study were conducting a narrative approach using English and the Nigerian Pidgin language instead of the range of indigenous Nigerian languages. Another limitation to this study is the fact that there is little or no research on this topic and could not form part of the present study. The recruitment of participants was challenging as such we even had to change the original recruitment plan from poster to direct approach. With over 350 known spoken languages, and Lagos as a cosmopolitan city, it could have difficult for the first author to be familiar with all spoken languages, hence the use of these two widely spoken languages. While some participants could not fully express their experience of TI, they were assisted to use body language and signs to express themselves, which may have resulted in some sensitive data being missed in translation.

Findings made on meanings made may have been different probably if study was a longitudinal type or if abused women had had the experience of TI for more than twelve weeks before data collection. This is because, change is a gradual process and the phenomenon under study affects emotions and behaviour all of which change with time. For instance, only two participants made

meaning to their experience of TI (Ifeoma, 23 and Lovette, 26 p13). This means that there was still high inconsistencies between their world view and situational realities (38).

## **Contribution to knowledge and recommendations for future research**

The present study contributes to knowledge about the onset of TI by identifying experiential triggers of TI among African participants. As first research, it provides valuable base line data for future research on TI in Nigeria and West of Africa. Some findings validate the effects of TI from rape and also show meaning made by Africans to the outcome of TI, which raises the impossibility of uniform intervention algorithm across the globe and measures for identifying TI. First responders such as nurses, must learn to appropriately deal with rape victims by being trauma aware. To strengthen the present findings, it would be beneficial to conduct that future research consider a larger study and across all age groups since rape cuts across all ages in order to have more options for responsive treatment plans. Knowledge generated from the narrations of the onset of TI might provide insight into understanding the reactions of victims to rape, believability of rape reports, and why some victims think of suicide. It would also be beneficial that future consider the grounded theory to TI study so as to originate principles of care from it.

We also recommend that researchers conducting sensitive research to consider the use of a mother tongue for in-depth interviews, or to invest in having appropriately trained and qualified language translators if there is a language difference. In addition, findings from these studies could facilitate the development of policies and interventions to alter rape-supportive attitudes and beliefs and enhance believability of reports of rape. Lastly, as we were only able to engage

five of the 13 survivors for member checking, it would be worthwhile to attempt to apply on the spot member checking, going further in sensitive research, especially where stigma is high.

## Conclusion

There is a strong likelihood that TI is not an uncommon experience for rape victims, but that in the absence of research and public reporting on the condition, the shame and self-blame associated with it will haunt many women. It will not only affect the quality of life of millions of these women who but their emotional wellbeing, sense of self-worth and relationships with other people, who may or may not believe and support them. In societies where justice may not run its full course for those traumatised by rape, salvaging their self-worth and esteem becomes essential to prevent women from suffering from a double injustice when all the systems fail them due to lack of knowledge.

## Declaration of conflicting interests

The author(s) declare no potential conflicts of interest with respect to the research, authorship, and/or publication of this article.

## Acknowledgments

We acknowledge rape victims and survivors all over the world, especially participants in this study, Nigeria, who shared their experiences with us for this study. We also acknowledge the governmental and one NGO post rape care and management facilities for granting us access to their facilities and most especially those specific staff that were assigned to assist with the initial recruitment process.

## Author contributions

**Conceptualization:** Dooshima Dorothy Gbahabo and <sup>□</sup>Sinegugu Evidence Duma  
**Data curation:** Dooshima Dorothy Gbahabo and <sup>□</sup>Sinegugu Evidence Duma  
**Formal analysis:** Dooshima Dorothy Gbahabo and <sup>□</sup>Sinegugu Evidence Duma  
**Investigation:** Dooshima Dorothy Gbahabo  
**Methodology:** Dooshima Dorothy Gbahabo and <sup>□</sup>Sinegugu Evidence Duma  
**Project administration:** Dooshima Dorothy Gbahabo  
**Resources:** College of Health Sciences, University of Kwa-Zulu Natal, Durban, South Africa  
**Supervision:** Sinegugu Evidence Duma  
**Validation:** Sinegugu Evidence Duma  
**Visualization:** Dooshima Dorothy Gbahabo and <sup>□</sup>Sinegugu Evidence Duma  
**Writing – original draft:** Dooshima Dorothy Gbahabo  
**Writing – review & editing:** Dooshima Dorothy Gbahabo and <sup>□</sup>Sinegugu Evidence Duma

## References

1. Alao OJ. An examination of impact of rape on the victim and the socio-development of Nigeria. Afro Asian Journal of Social Sciences. 2018;9(3):1-8.
2. Kozłowska K, Walker P, McLean L, Carrive P. Fear and the defense cascade: clinical implications and management. Harvard review of psychiatry. 2015.
3. Levack P, Paterson G. Commitment to talking not just treating. BMJ. 2016;355.
4. Möller A, Söndergaard HP, Helström L. Tonic immobility during sexual assault—a common reaction predicting post-traumatic stress disorder and severe depression. Acta obstetrica et gynecologica Scandinavica. 2017;96(8):932-8.

5. Akinlusi FM, Rabiou KA, Olawepo TA, Adewunmi AA, Ottun TA, Akinola OI. Sexual assault in Lagos, Nigeria: a five year retrospective review. BMC women's health. 2014;14(1):1-7.
6. Ezechi OC, AdesolaMusa Z, David AN, Wapmuk AE, Gbajabiamila TA, EugeniaIdigbe I, et al. Trends and patterns of sexual assaults in Lagos south-western Nigeria. The Pan African Medical Journal. 2016;24.
7. Idoko CA, Nwobodo E, Idoko CI. Trends in rape cases in a Nigerian state. African health sciences. 2020;20(2):668-75.
8. Ademola J. Attitudes, norms and experiences of sexual coercion among young people in Ibadan, Nigeria. Sex without consent Young people in developing countries. 2005.
9. Kullima AA, Kawuwa MB, Audu BM, Mairiga AG, Bukar M. Sexual assault against female Nigerian students. African journal of reproductive health. 2010;14(3):189-93.
10. Aguocha CM, Duru CB, Onoh RC, Olose EO, Igwe MN, Amadi KU, et al. Experience of intimate partner violence among female health workers in South East Nigeria. Mental Health, Religion & Culture. 2017;20(8):827-40.
11. Tade O, Udechukwu C. Characterizing rapists and their victims in select Nigeria newspapers. Psycho-Social Aspects of Human Sexuality and Ethics. 2021:19.
12. Duma S. The pain of being a woman: An in-depth research on recovery from sexual assault trauma: Mepho Publishers; 2016.
13. Light E. Predictors of tonic immobility in sexual assault survivors: California State University, Fullerton; 2017.
14. TeBockhorst SF, O'Halloran MS, Nyline BN. Tonic immobility among survivors of sexual assault. Psychological trauma: theory, research, practice, and policy. 2015;7(2):171.

15. Van Buren BR, Weierich MR. Peritraumatic tonic immobility and trauma-related symptoms in adult survivors of childhood sexual abuse: the role of posttrauma cognitions. *Journal of child sexual abuse*. 2015;24(8):959-74.
16. Daved van Stralen M, Mercer TA, RAdm U. Pragmatic High-Reliability Organizations (HRO) Modulate the Functions of Stress and Fear Behaviors During Pandemic COVID-19: The Stress-Fear-Threat Cascade. *TODAY Peer Reviewed Research, News and Information*. 2020;15(10):126.
17. Gallup GG. Tonic immobility: The role of fear and predation. *The Psychological Record*. 1977;27(1):41-61.
18. Marx BP, Forsyth JP, Gallup GG, Fusé T. Tonic immobility as an evolved predator defense: Implications for sexual assault survivors. *Clinical Psychology: Science and Practice*. 2008;15(1):74.
19. Dhillon M. EVA NOTES-The 'FREEZE' RESPONSE to SEXUAL VIOLENCE-2 x. 2017.
20. Lloyd CS, Lanius RA, Brown MF, Neufeld RJ, Frewen PA, McKinnon MC. Assessing post-traumatic tonic immobility responses: the scale for tonic immobility occurring post-trauma. *Chronic Stress*. 2019;3:2470547018822492.
21. Widanaralalage BK, Hine BA, Murphy AD, Murji K. "I didn't feel i was a victim": a phenomenological analysis of the experiences of male-on-male survivors of rape and sexual abuse. *Victims & Offenders*. 2022:1-26.
22. Van Wijk E. The lived experience of male intimate partners of female rape victims in Cape Town, South Africa. 2010.

23. Ajayi CE, Chantler K, Radford L. The role of cultural beliefs, norms, and practices in Nigerian women's experiences of sexual abuse and violence. *Violence against women*. 2022;28(2):465-86.
24. Hagenaars MA. Tonic immobility and PTSD in a large community sample. *Journal of Experimental Psychopathology*. 2016;7(2):246-60.
25. Pratt S. Tonic Immobility, Disclosure, and Substance Use as Predictors of Self-Blame in Female Survivors of Nonconsensual Sexual Events: Alliant International University; 2022.
26. Sakai M. Death-Feigning in Insects: Mechanism and Function of Tonic Immobility: Springer Nature; 2021.
27. Campbell R, editor *The neurobiology of sexual assault: Implications for first responders in law enforcement, prosecution, and victim advocacy*. NIJ Research for the Real World Seminar; 2012: National Institute of Justice Washington, DC.
28. Duma S. *The Sexual Assault Victim: what Every Nurse Practitioner Should Know*. 2016.
29. Portugal LCL, Pereira MG, Alves RdCS, Tavares G, Lobo I, Rocha-Rego V, et al. Peritraumatic tonic immobility is associated with posttraumatic stress symptoms in undergraduate Brazilian students. *Brazilian Journal of Psychiatry*. 2012;34:60-5.
30. Suarez SD, Gallup GG. Tonic immobility as a response to rape in humans a theoretical note. *The Psychological Record*. 1979;29(3):315-20.
31. Roelofs K, Dayan P. Freezing revisited: coordinated autonomic and central optimization of threat coping. *Nature Reviews Neuroscience*. 2022;23(9):568-80.
32. Haffejee S, Theron L. Resilience processes in sexually abused adolescent girls: A scoping review of the literature. *South African Journal of Science*. 2017;113(9-10):1-9.



33. Park C, Boals A. Current assessment and interpretation of perceived post-traumatic growth. Redesigning research on post-traumatic growth. 2021:12-26.
34. Park CL, Folkman S. Meaning in the context of stress and coping. Review of general psychology. 1997;1(2):115-44.
35. Park CL. Meaning Making Following Trauma. Frontiers in Psychology. 2022;13:844891-.
36. Lewis MA, Neighbors C, Geisner IM, Lee CM, Kilmer JR, Atkins DC. Examining the associations among severity of injunctive drinking norms, alcohol consumption, and alcohol-related negative consequences: the moderating roles of alcohol consumption and identity. Psychology of Addictive Behaviors. 2010;24(2):177.
37. Noviana U. Development of a nursing support program on finding meaning in life for relocated disaster survivors of the 2010 Mt. Merapi eruption, Indonesia: 千葉大学; 2017.
38. Park CL. Distinctions to promote an integrated perspective on meaning: Global meaning and meaning-making processes. Journal of Constructivist Psychology. 2017;30(1):14-9.
39. Wang CC, Geale SK. The power of story: Narrative inquiry as a methodology in nursing research. International journal of nursing sciences. 2015;2(2):195-8.
40. Moser A, Korstjens I. Series: Practical guidance to qualitative research. Part 3: Sampling, data collection and analysis. European journal of general practice. 2018;24(1):9-18.
41. Vasileiou K, Barnett J, Thorpe S, Young T. Characterising and justifying sample size sufficiency in interview-based studies: systematic analysis of qualitative health research over a 15-year period. BMC medical research methodology. 2018;18(1):1-18.
42. Boddy CR. Sample size for qualitative research. Qualitative Market Research: An International Journal. 2016.

43. Norte, C.E., Volchan, E., Vila, J., Mata, J.L., Arbol, J.R., Mendlowicz, M., Berger, W., Luz, M.P., Rocha-Rego, V., Figueira, I. and Souza, G.G.L.D., 2019. Tonic immobility in PTSD: exacerbation of emotional cardiac defense response. *Frontiers in Psychology*, 10, p.1213
44. Volchan E, Rocha-Rego V, Bastos AF, Oliveira JM, Franklin C, Gleiser S, et al. Immobility reactions under threat: a contribution to human defensive cascade and PTSD. *Neuroscience & Biobehavioral Reviews*. 2017;76:29-38.
45. Maia DB, Nóbrega A, Marques-Portella C, Mendlowicz MV, Volchan E, Coutinho ES, et al. Peritraumatic tonic immobility is associated with PTSD symptom severity in Brazilian police officers: a prospective study. *Brazilian Journal of Psychiatry*. 2014;37:49-54.
46. Birt L, Scott S, Cavers D, Campbell C, Walter F. Member checking: a tool to enhance trustworthiness or merely a nod to validation? *Qualitative health research*. 2016;26(13):1802-11.
47. Kanuch SW, Cassidy KA, Dawson NV, Athey M, Fuentes-Casiano E, Sajatovic M. Recruiting and retaining individuals with serious mental illness and diabetes in clinical research: lessons learned from a randomized, controlled trial. *Journal of health disparities research and practice*. 2016;9(3):115.
48. Kleintjes S, Lund C, Swartz L, Flisher A, Consortium MRP. Mental health care user participation in mental health policy development and implementation in South Africa. *International Review of Psychiatry*. 2010;22(6):568-77.
49. Association WM. WMA Declaration of Helsinki—ethical principles for medical research involving human subjects. 2013. 2018.

50. Haydon G, van der Riet P. Narrative inquiry: A relational research methodology suitable to explore narratives of health and illness. *Nordic Journal of Nursing Research*. 2017 Jun;37(2):85-9.
51. Berry LE. The research relationship in narrative enquiry. *Nurse Researcher*. 2016 Sep 19;24(1).
52. Ejioogu N, Norbeck JH, Mason MA, Cromwell BC, Zonderman AB, Evans MK. Recruitment and retention strategies for minority or poor clinical research participants: lessons from the Healthy Aging in Neighborhoods of Diversity across the Life Span study. *The Gerontologist*. 2011 Jun 1;51(suppl\_1):S33-45.
53. Duma SE, Khanyile TD, Daniels F. Managing ethical issues in sexual violence research using a pilot study. *Curationis*. 2009;32(1):52-8
54. Anas N, Ishaq K. Qualitative research method in social and behavioural science research. *International journal of management, social sciences, peace and conflict studies*. 2022 Mar 27;5(1).
55. Lin LC. Data management and security in qualitative research. *Dimensions of Critical Care Nursing*. 2009 May 1;28(3):132-7
56. Braun V, Clarke V. Using thematic analysis in psychology. *Qualitative research in psychology*. 2006 Jan 1;3(2):77-101.
57. Austin Z, Sutton J. Qualitative research: Getting started. *The Canadian journal of hospital pharmacy*. 2014 Nov;67(6):436
58. Mazonde NB, Carmichael T. The African context, cultural competence and emic aspects of qualitative research. *Journal of African Business*. 2020 Oct 1;21(4):476-92

59. Maguire M, Delahunt B. Doing a thematic analysis: A practical, step-by-step guide for learning and teaching scholars. All Ireland Journal of Higher Education. 2017 Oct 31;9(3)
60. Ryan GW, Russel BH. Techniques to identify themes in qualitative data. Field Methods. 2003;15(1):85-109
61. Kang E, Hwang HJ. Ethical Conducts in Qualitative Research Methodology: Participant Observation and Interview Process. Journal of Research and Publication Ethics. 2021;2(2):5-10.
62. Creswell JW, Poth CN. Qualitative inquiry and research design: Choosing among five approaches. Sage publications; 2016 Dec 19.
63. Ritchie J, Lewis J, Nicholls CM, Ormston R, editors. Qualitative research practice: A guide for social science students and researchers. sage; 2013 Nov 1.
64. Lor M, Bowers BJ. Feasibility of audio□computer□assisted self□interviewing with color□coding and helper assistance (ACASI□H) for Hmong older adults. Research in nursing & health. 2017 Aug;40(4):360-71
65. Dierenfeldt R, Naylor M, Bilardi S. Community context, weapon use, and victim injury: a multi-level study of offense severity in the sexual victimization of women. American journal of criminal justice. 2019 Oct;44(5):788-811
66. Ogunlana MO, Nwosu IB, Fafolahan A, Ogunsola BF, Sodeke TM, Adegoke OM, Odunaiya NA, Govender P. Pattern of rape and femicide during COVID-19 lockdown: content and discourse analysis of digital media reports in Nigeria. Journal of Gender Studies. 2021 Dec 18:1-4.

67. Abrahams, N., Jewkes, R. and Mathews, S., 2013. Depressive symptoms after a sexual assault among women: understanding victim-perpetrator relationships and the role of social perceptions. *African journal of psychiatry*, 16(4), pp.288-293.
68. Marks IM. Fears, phobias, and rituals: Panic, anxiety, and their disorders. Oxford University Press on Demand; 1987
69. Matsumura K, Yumise K, Fujii Y, Hayashi T, Miyatake T. Anti-predator behaviour depends on male weapon size. *Biology letters*. 2020 Dec 23;16(12):20200601
70. Mgozoli SE, Duma SE. “As I was walking down the street, four strange guys came and took me under the bridge, where they all raped me”: an interpretative phenomenological analysis of the types of rape experienced by men in South Africa. *American journal of men's health*. 2019 Dec;13(6):1557988319882589.
71. Schiwe M. Tonic immobility: The fear-freeze response as a forgotten factor in sexual assault laws. *DePaul J. Women Gender & L.*. 2019;8:1.
72. Kalaf J, Coutinho ES, Vilete LM, Luz MP, Berger W, Mendlowicz M, Volchan E, Andreoli SB, Quintana MI, de Jesus Mari J, Figueira I. Sexual trauma is more strongly associated with tonic immobility than other types of trauma—A population based study. *Journal of affective disorders*. 2017 Jun 1;215:71-6
73. Herbert, C., 2017. Overcoming traumatic stress: A self-help guide using cognitive behavioural techniques. Hachette UK.
74. Collins N. 10. Broken or Superpowered? Traumatized People, Toxic Doublethink and the Healing Potential of Evangelical Christian Communities. *Feminist Trauma Theologies: Body, Scripture & Church in Critical Perspective*. 2020 Feb 28.

75. Heritage S. Why didn't she fight back? An exploration of victim blaming through tonic immobility reactions to sexual violence (Doctoral dissertation, University of Worcester). 2021
76. Li H, Wen J. Behaviour and metabolism during tonic immobility (death-feigning) in *Eucryptorrhynchus scrobiculatus* and *E. brandti* (Coleoptera: Curculionidae). *European Journal of Entomology*. 2021;118:322-9.
77. de Heer BA, Jones LC. Investigating the self-protective potential of immobility in victims of rape. *Violence and victims*. 2017 Jan 1;32(2):210-29.
78. Carli G, Farabollini F. Tonic immobility as a survival, adaptive response and as a recovery mechanism. *Progress in Brain Research*. 2022 Mar 3;271(1):305-29.
79. Fragkaki I, Stins J, Roelofs K, Jongedijk RA, Hagenaars MA. Tonic immobility differentiates stress responses in PTSD. *Brain and Behavior*. 2016 Nov;6(11):e00546
80. Ford JD, Grasso DJ, Elhai JD, Courtois CA. Posttraumatic stress disorder: Scientific and professional dimensions. Academic press; 2015 Jul 31
81. Leach J. Why people 'freeze' in an emergency: temporal and cognitive constraints on survival responses. *Aviation, space, and environmental medicine*. 2004 Jun 1;75(6):539-42.
82. Galliano G, Noble LM, Travis LA, Puechl C. Victim reactions during rape/sexual assault: A preliminary study of the immobility response and its correlates. *Journal of Interpersonal Violence*. 1993 Mar;8(1):109-14
83. Wulandari, I., 2013. Incest in African American Society in Sapphire's Push (Doctoral dissertation, Yogyakarta State University).
84. Mason, D., James, D., Andrew, L. and Fox, J.R., 2022. 'The last thing you feel is the self-disgust'. The role of self-directed disgust in men who have attempted suicide: A

grounded theory study. *Psychology and Psychotherapy: Theory, Research and Practice*, 95(2), pp.575-599.

85. Common Reactions to Sexual Assault – Counseling Center – Loyola University Maryland [Internet]. [www.loyola.edu](http://www.loyola.edu). Available from: <https://www.loyola.edu/departments/counseling-center/services/students/concerns/sexual-assault/reactions>. Assessed 20 Jul, 2022.

86. Ochberg F. Post-traumatic therapy and victims of violence. In *Post-traumatic therapy and victims of violence* 2013 Jun 17 (pp. 17-34). Routledge.

87. Jordan J. *Tackling Rape Culture: Ending Patriarchy*. Routledge; 2022 Jul 8

88. Rousseau D. *Retraumatized: the long-term consequences of victim blaming*. 2021

89. Turnell AI, Fassnacht DB, Batterham PJ, Calear AL, Kyrios M. The Self-Hate Scale: Development and validation of a brief measure and its relationship to suicidal ideation. *Journal of affective disorders*. 2019 Feb 15;245:779-87.

90. van der Westhuizen M, Walker-Williams HJ, Fouché A. Meaning-making mechanisms in women survivors of childhood sexual abuse: a scoping review. *Trauma, Violence, & Abuse*. 2022 Feb 2;15248380211066100

91. Rainbow C, Baldwin P, Hosking W, Gill P, Blashki G, Shand F. Psychological distress, and suicidal ideation in Australian online help-seekers: the mediating role of perceived burdensomeness. *Archives of suicide research*. 2021 Dec 21:1-4

92. Kealy D, Treeby MS, Rice SM. Shame, guilt, and suicidal thoughts: The interaction matters. *British Journal of Clinical Psychology*. 2021 Sep;60(3):414-23

93. Zhao J, Chi Y, Ju Y, Liu X, Wang J, Liu X, Lew B, Siau CS, Jia C. Shame and suicidal ideation among undergraduates in China: the mediating effect of thwarted belongingness

- and perceived burdensomeness. International journal of environmental research and public health. 2020 Apr;17(7):2360
94. Alix S, Cossette L, Cyr M, Frappier JY, Caron PO, Hébert M. Self-blame, shame, avoidance, and suicidal ideation in sexually abused adolescent girls: a longitudinal study. Journal of child sexual abuse. 2020 May 18;29(4):432-47
95. Nayback-Beebe AM, Yoder LH. The Lived Experiences of a Male Survivor of Intimate Partner Violence: A Qualitative Case Study. Medsurg nursing. 2012 Mar 1;21(2).
96. Magalhaes AA, Gama CM, Gonçalves RM, Portugal LC, David IA, Serpeloni F, Pinto LW, Assis SG, Avanci JQ, Volchan E, Figueira I. Tonic Immobility is Associated with PTSD Symptoms in Traumatized Adolescents. Psychology Research and Behavior Management. 2021; 14:1359
97. Brewin CR, Andrews B, Rose S. Fear, helplessness, and horror in posttraumatic stress disorder: Investigating DSM-IV Criterion A2 in victims of violent crime. Journal of Traumatic Stress: Official Publication of The International Society for Traumatic Stress Studies. 2000 Jul;13(3):499-509
98. Messina-Dysert G. Rape culture and spiritual violence: Religion, testimony, and visions of healing. Routledge; 2015 May 8.
99. Harmer, B., Lee, S., TvH, D. and Saadabadi, A., 2020. Suicidal ideation.
100. Shobhana SS, Raviraj KG. Global trends of suicidal thought, suicidal ideation, and self-harm during COVID-19 pandemic: a systematic review. Egyptian journal of forensic sciences. 2022 Dec;12(1):1-4
101. FL, Lu CY, Owen-Smith AA, Sala-Hamrick KJ. Detecting and distinguishing indicators of risk for suicide using clinical records. Translational psychiatry. 2022 Jul 13;12(1):1-9



102. Necho M, Tsehay M, Zenebe Y. Suicidal ideation, attempt, and its associated factors among HIV/AIDS patients in Africa: a systematic review and meta-analysis study. International journal of mental health systems. 2021 Dec;15(1):1-6
103. Bernert RA, Hom MA, Iwata NG, Joiner TE. Objectively assessed sleep variability as an acute warning sign of suicidal ideation in a longitudinal evaluation of young adults at high suicide risk. The Journal of clinical psychiatry. 2017 Jun 28;78(6):19738
104. Bukar HM, Mohammed HI, Ngada BJ. The Causes of Rape on Teenage Girls in Yobe State, Nigeria. International Journal of Management Studies and Social Science Research. 2021;3(4):99-108
105. Haruna A, Kajumba MM, Kibanja GM. Cultural response to PTSD functional adjustment: Impact of religiosity and spirituality among the Kanuri community of Damaturu Nigeria. Spirituality in Clinical Practice. 2021 Jun 3
106. Park CL, Smith PH, Lee SY, Mazure CM, McKee SA, Hoff R. Positive and negative religious/spiritual coping and combat exposure as predictors of posttraumatic stress and perceived growth in Iraq and Afghanistan veterans. Psychology of religion and spirituality. 2017 Feb;9(1):13.
107. Lepherd L. Spirituality: Everyone has it, but what is it?. International Journal of Nursing Practice. 2015 Oct;21(5):566-74.
108. Park CL. The meaning making model: A framework for understanding meaning, spirituality, and stress-related growth in health psychology. European Health Psychologist. 2013 Jun 1;15(2):40-7
109. Frankl VE. Man's search for meaning. Rider; 2008 Aug 2

952 110. Park CL, Ai AL. Meaning making and growth: New directions for research on survivors of  
953 trauma. *Journal of Loss and Trauma*. 2006 Dec 1;11(5):389-407.

954 111. Masten A. Models of resilience. *Ordinary magic: resilience in development*. 2014:23-50.

955 112. Cummings JP, Pargament KI. Medicine for the spirit: Religious coping in individuals with  
956 medical conditions. *Religions*. 2010 Nov 12;1(1):28-53.

957 113. Burke, L. A., & Neimeyer, R. A. Meaning-making. In M. Cobb, C. M. Puchalski, & B.  
958 Rumbold (Eds.), *Oxford textbook of spirituality in healthcare*. Oxford University Press.  
959 2012 127–133.

960
